# Supplementary material for: Iron(ii)-catalyzed sulfur directed C(sp3)–H bond amination/C–S cross coupling reaction
Source: Royal Society of Chemistry journal article supplement (doi:10.1039/c6cc10303k), 2017-01-01

## Electronic Supplementary Information

# Iron(II)-Catalyzed Sulfur Directed C(sp<sup>3</sup>)-H Bonds Amination/C-S Cross Coupling

Fang-Fang Duan, Shi-Qian Song, Run-Sheng Xu,\*

*Department of Biology and Environment, Zhejiang A & F University,*

*Hangzhou 311800, Zhejiang China*

*\*E-mail: 20140041@zafu.edu.cn*

## Contents

|                                   |           |
|-----------------------------------|-----------|
| <b>Contents</b> .....             | <b>S1</b> |
| <b>Experimental Details</b> ..... | <b>S2</b> |
| <b>Analytical Datas</b> .....     | <b>S4</b> |
| <b>Spectrums</b> .....            | <b>S9</b> |

## Experimental Details

### General information

All reagents used in the experiment were obtained from commercial sources and used without further purification. Unless otherwise noted, all reactions were carried out at N<sub>2</sub> atmosphere. Analytical thin layer chromatography (TLC) employed glass 0.25 mm silica gel plates. All NMR spectra were recorded on Bruker AVANCE DMX-500 spectrometry for <sup>1</sup>H NMR at 500 MHz, <sup>13</sup>C NMR at 125 MHz, <sup>19</sup>F NMR at 470 MHz in CDCl<sub>3</sub>, respectively. Unless otherwise noted, <sup>1</sup>H and <sup>13</sup>C chemical shifts are referenced to at CDCl<sub>3</sub> at 7.24 ppm and 77.0 ppm. Multiplicities are reported using the following abbreviations: s = singlet, d = doublet, t = triplet, q = quartet, m = multiplet, br = broad resonance. The <sup>1</sup>H NMR spectra were reported in delta (δ) units, parts per million (ppm) downfield from the internal standard. Coupling constants are reported in Hertz (Hz). Mass spectras were performed on a Bruker Esquire 3000plus mass spectrometer equipped with ESI interface and ion trap analyzer. The ESI-HRMS were tested on Bruker 7-tesla FT-ICR MS equipped with an electrospray source.

### General procedure for preparation of **3** and **5**

A mixture of phenyl-methanethiol **1a** (0.3 mmol, 37.2 mg), 2-Iodo-

phenylamine **2a** (0.3 mmol, 65.7 mg), Fe(OAc)<sub>2</sub> (5 mol%, 8.7 mg), 2-(2-Dimethylamino-vinyl)-inden-1-one **L5** (5 mol%, 10.0 mg) and Cs<sub>2</sub>CO<sub>3</sub> (2 equiv, 195.6 mg) in DMSO (4 mL) was stirred under a N<sub>2</sub> atmosphere. After the reaction mixture was stirred at 100 °C for 24 h, it was allowed to cool to ambient temperature. Then the mixture was quenched with saturated salt water (10 mL), and the solution was extracted with ethyl acetate (3 × 10 mL). The organic layers were combined and dried by sodium sulfate and concentrated in vacuo. The pure product 2-Phenylbenzothiazole **5a** (54.4 mg, 86% yield) was obtained by flash column chromatography on silica gel.

## Analytical Datas

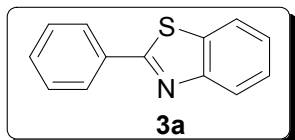

**2-phenylbenzo[d]thiazole** White solid;

$^1\text{H}$  NMR (500 MHz,  $\text{CDCl}_3$ ):  $\delta$  8.12-8.09 (m, 3 H), 7.93-7.91 (d,  $J$  = 8.0 Hz, 1 H), 7.53-7.50 (m, 4 H), 7.42-7.39 (m, 1 H);

$^{13}\text{C}$  NMR (125 MHz,  $\text{CDCl}_3$ ):  $\delta$  168.3, 154.4, 135.3, 133.9, 131.2, 129.3, 127.8, 126.6, 125.4, 123.5, 121.9;

ESI-HRMS  $m/z$ : Calcd for  $\text{C}_{13}\text{H}_{10}\text{NS}^+$   $[\text{M}+\text{H}]^+$ : 212.0534; Found 212.0537.

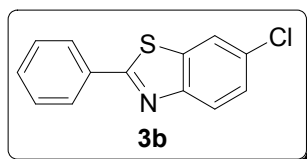

**5-chloro-2-phenylbenzo[d]thiazole** White solid;

$^1\text{H}$  NMR (500 MHz,  $\text{CDCl}_3$ ):  $\delta$  8.10-8.07 (m, 3 H), 7.82-7.81 (d,  $J$  = 8.5 Hz, 1 H), 7.54-7.49 (m, 3 H), 7.38-7.36 (m, 1 H);

$^{13}\text{C}$  NMR (125 MHz,  $\text{CDCl}_3$ ):  $\delta$  170.2, 155.3, 133.5, 132.6, 131.6, 129.4, 127.9, 125.9, 123.3, 122.6;

ESI-HRMS  $m/z$ : Calcd for  $\text{C}_{13}\text{H}_9\text{ClNS}^+$   $[\text{M}+\text{H}]^+$ : 246.0144; Found 246.0147.

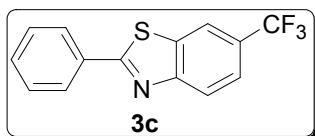

**5-(trifluoromethyl)-2-phenylbenzo[d]thiazole** White solid;

$^1\text{H}$  NMR (500 MHz,  $\text{CDCl}_3$ ):  $\delta$  8.35 (s, 1 H), 8.12-8.10 (m, 2 H), 8.02-8.00

(d,  $J = 8.5$  Hz, 1 H), 7.64-7.62 (d,  $J = 8.0$  Hz, 1 H), 7.56-7.51 (m, 3 H);

$^{13}\text{C}$  NMR (125 MHz,  $\text{CDCl}_3$ ):  $\delta$  170.4, 154.0, 138.7, 133.3, 131.9, 129.3 ( $J = 3.3$  Hz), 128.0, 125.6, 123.4, 122.5, 121.8 ( $J = 3.3$  Hz), 121.7 ( $J = 3.4$  Hz), 120.7, 120.6 ( $J = 3.8$  Hz);

$^{19}\text{F}$  NMR (470 MHz,  $\text{CDCl}_3$ )  $\delta$  -77.35;

ESI-HRMS  $m/z$ : Calcd for  $\text{C}_{14}\text{H}_9\text{F}_3\text{NS}^+$   $[\text{M}+\text{H}]^+$ : 280.0408; Found 280.0411.

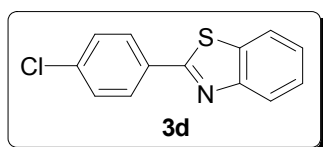

**2-(4-chlorophenyl)benzo[d]thiazole** White solid;

$^1\text{H}$  NMR (500 MHz,  $\text{CDCl}_3$ ):  $\delta$  8.09-8.07 (d,  $J = 8.0$  Hz, 2 H), 7.92-7.90 (d,  $J = 8.0$  Hz, 1 H), 7.53-7.47 (m, 3 H), 7.42-7.39 (m, 1 H);

$^{13}\text{C}$  NMR (125 MHz,  $\text{CDCl}_3$ ):  $\delta$  166.9, 154.3, 137.3, 135.3, 132.4, 129.5, 129.0, 126.7, 125.7, 123.6, 121.9;

ESI-HRMS  $m/z$ : Calcd for  $\text{C}_{13}\text{H}_9\text{ClNS}^+$   $[\text{M}+\text{H}]^+$ : 246.0144; Found 246.0147.

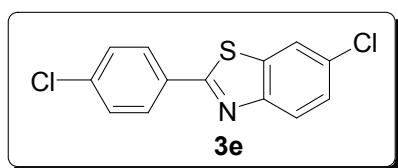

**5-chloro-2-(4-chlorophenyl)benzo[d]thiazole** White solid;

$^1\text{H}$  NMR (500 MHz,  $\text{CDCl}_3$ ):  $\delta$  8.05-8.00 (m, 3 H), 7.81-7.80 (s,  $J = 8.5$  Hz, 1 H), 7.49-7.47 (m, 2 H), 7.38-7.36 (m, 1 H);

$^{13}\text{C}$  NMR (125 MHz,  $\text{CDCl}_3$ ):  $\delta$  168.7, 155.2, 137.7, 133.6, 132.8, 132.0, 129.6, 129.0, 126.1, 123.4, 122.6;

ESI-HRMS  $m/z$ : Calcd for  $\text{C}_{13}\text{H}_8\text{Cl}_2\text{NS}^+$   $[\text{M}+\text{H}]^+$ : 279.9754; Found

279.9757.

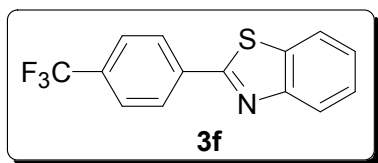

**2-(4-(trifluoromethyl)phenyl)benzo[d]thiazole** White solid;

$^1\text{H}$  NMR (500 MHz,  $\text{CDCl}_3$ ):  $\delta$  8.22-8.20 (d,  $J = 8.5$  Hz, 2 H), 8.13-8.11 (d,  $J = 8.5$  Hz, 1 H), 7.95-7.93 (d,  $J = 8.5$  Hz, 1 H), 7.76-7.75 (d,  $J = 8.5$  Hz, 1 H), 7.46-7.43 (m, 1 H);

$^{13}\text{C}$  NMR (125 MHz,  $\text{CDCl}_3$ ):  $\delta$  166.3, 137.0, 135.5, 132.9, 132.6, 128.0, 126.9, 126.3 ( $J = 3.5$  Hz), 126.2 ( $J = 3.6$  Hz), 126.0, 125.2, 123.9, 123.0, 122.0;

$^{19}\text{F}$  NMR (470 MHz,  $\text{CDCl}_3$ )  $\delta$  -62.23;

ESI-HRMS  $m/z$ : Calcd for  $\text{C}_{14}\text{H}_9\text{F}_3\text{NS}^+$   $[\text{M}+\text{H}]^+$ : 280.0408; Found 280.0411.

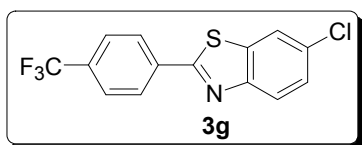

**2-(4-chlorophenyl)-5-(trifluoromethyl)benzo[d]thiazole** White solid;

$^1\text{H}$  NMR (500 MHz,  $\text{CDCl}_3$ ):  $\delta$  8.33 (s, 1 H), 8.05-8.01 (m, 3 H), 7.65-7.63 (m, 1 H), 7.53-7.49 (m, 2 H), 7.28-7.27 (m, 2 H);

$^{13}\text{C}$  NMR (125 MHz,  $\text{CDCl}_3$ ):  $\delta$  168.4, 153.9, 138.8, 136.4, 133.3 ( $J = 32.5$  Hz), 129.7 ( $J = 32.4$  Hz), 128.2, 126.5 ( $J = 3.8$  Hz), 126.4 ( $J = 3.5$ ), 125.2 ( $J = 48.3$  Hz), 123.3, 122.8 ( $J = 25.4$ ), 122.4 ( $J = 3.4$  Hz), 121.1 ( $J = 4.0$  Hz);

$^{19}\text{F}$  NMR (470 MHz,  $\text{CDCl}_3$ )  $\delta$  -65.11;

ESI-HRMS *m/z*: Calcd for C<sub>14</sub>H<sub>8</sub>ClF<sub>3</sub>NS<sup>+</sup> [M+H]<sup>+</sup>: 314.0018; Found 314.0021.

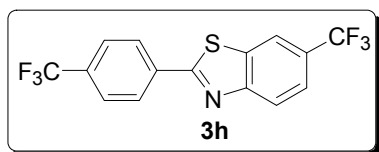

**5-(trifluoromethyl)-2-(4-(trifluoromethyl)phenyl)benzo[d]thiazole**

White solid;

<sup>1</sup>H NMR (500 MHz, CDCl<sub>3</sub>): δ 8.20-8.18 (d, *J* = 8.0 Hz, 2 H), 8.09 (s, 1 H), 7.85-7.83 (s, *J* = 8.5 Hz, 1 H), 7.77-7.56 (m, 2 H), 7.42-7.40 (m, 1 H);

<sup>13</sup>C NMR (125 MHz, CDCl<sub>3</sub>): δ 167.2, 153.9, 149.6, 138.8, 138.7, 129.9 (*J* = 30.6 Hz), 128.7, 125.3, 124.6, 123.0 (*J* = 47.1 Hz), 122.7 (*J* = 3.4 Hz), 122.7, 121.4, 121.4, 121.3, 121.3;

<sup>19</sup>F NMR (470 MHz, CDCl<sub>3</sub>) δ -64.09, -80.94;

ESI-HRMS *m/z*: Calcd for C<sub>15</sub>H<sub>8</sub>F<sub>6</sub>NS<sup>+</sup> [M+H]<sup>+</sup>: 348.0282; Found 348.00285.

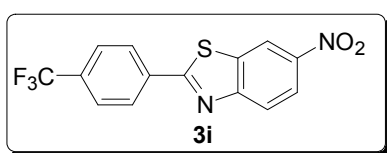

**5-(trifluoromethyl)-2-(4-nitrophenyl)benzo[d]thiazole** White solid;

<sup>1</sup>H NMR (500 MHz, CDCl<sub>3</sub>): δ 8.38-8.36 (m, 3 H), 8.27-8.26 (m, 2 H), 8.08-8.06 (d, *J* = 8.5 Hz, 1 H), 7.70-7.68 (d, *J* = 8.5 Hz, 1 H);

<sup>13</sup>C NMR (125 MHz, CDCl<sub>3</sub>): δ 168.1, 155.1, 136.7, 133.7, 133.0, 128.1, 126.6, 126.4, 126.3, 126.3, 123.3, 122.7;

<sup>19</sup>F NMR (470 MHz, CDCl<sub>3</sub>) δ -70.58;

ESI-HRMS *m/z*: Calcd for C<sub>14</sub>H<sub>8</sub>F<sub>3</sub>N<sub>2</sub>O<sub>2</sub>S<sup>+</sup> [M+H]<sup>+</sup>: 325.0259; Found 325.0262.

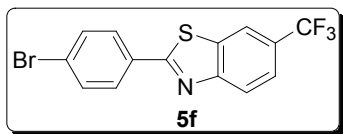

**2-(4-bromophenyl)-5-(trifluoromethyl)benzo[d]thiazole** White solid;

<sup>1</sup>H NMR (500 MHz, CDCl<sub>3</sub>): δ 8.37-8.35 (d, *J* = 8.5 Hz, 2 H), 8.26-8.24 (d, *J* = 9.0 Hz, 2 H), 8.11 (d, 1 H), 7.88-7.86 (d, *J* = 8.5 Hz, 1 H), 7.45-7.43 (m, 1 H);

<sup>13</sup>C NMR (125 MHz, CDCl<sub>3</sub>): δ 166.9, 155.1, 149.7, 139.0, 134.0, 133.3, 128.6, 127.0, 124.6, 123.9, 122.8;

<sup>19</sup>F NMR (470 MHz, CDCl<sub>3</sub>) δ -79.64;

ESI-HRMS *m/z*: Calcd for C<sub>14</sub>H<sub>8</sub>BrF<sub>3</sub>NS + [M+H]<sup>+</sup>: 357.9513; Found 357.9516.



# Spectrums

3a

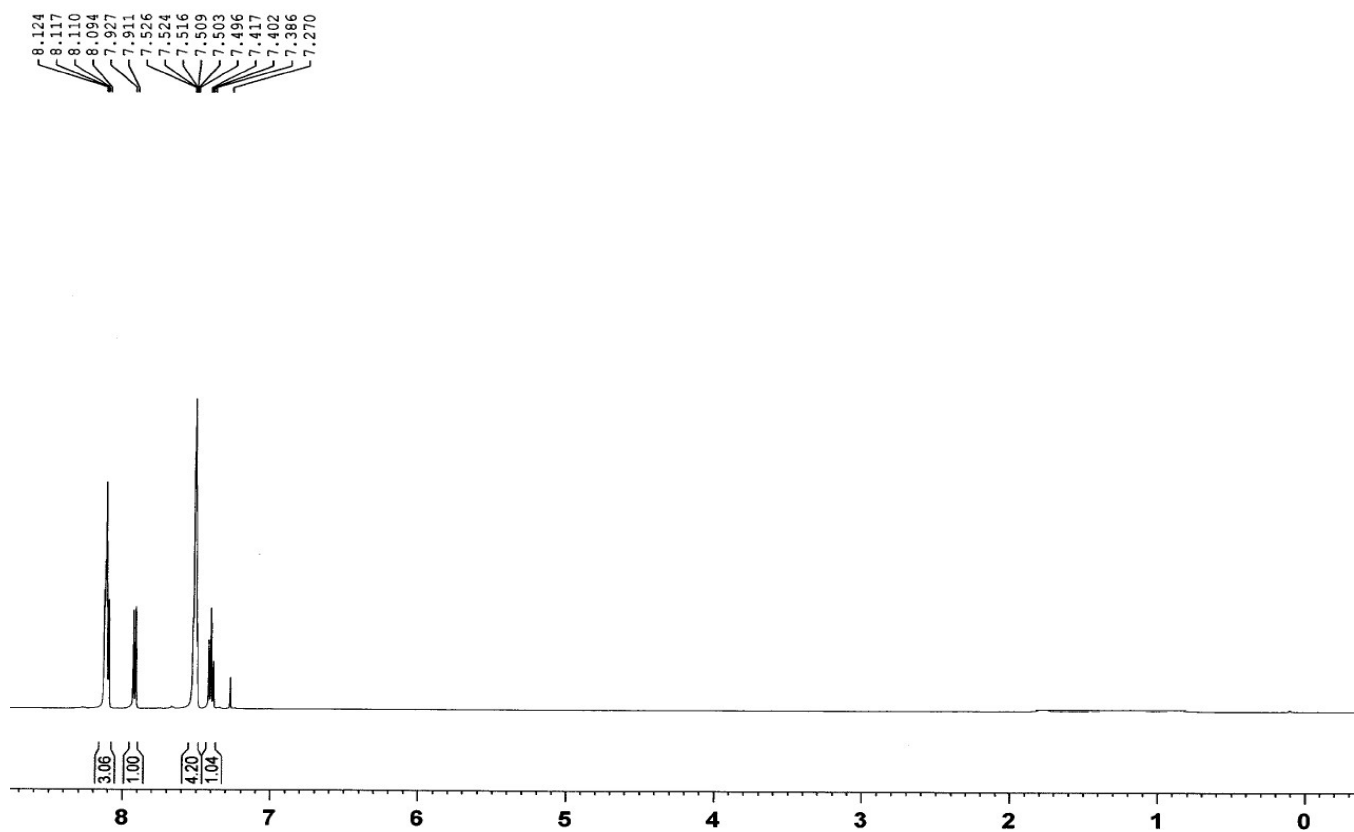

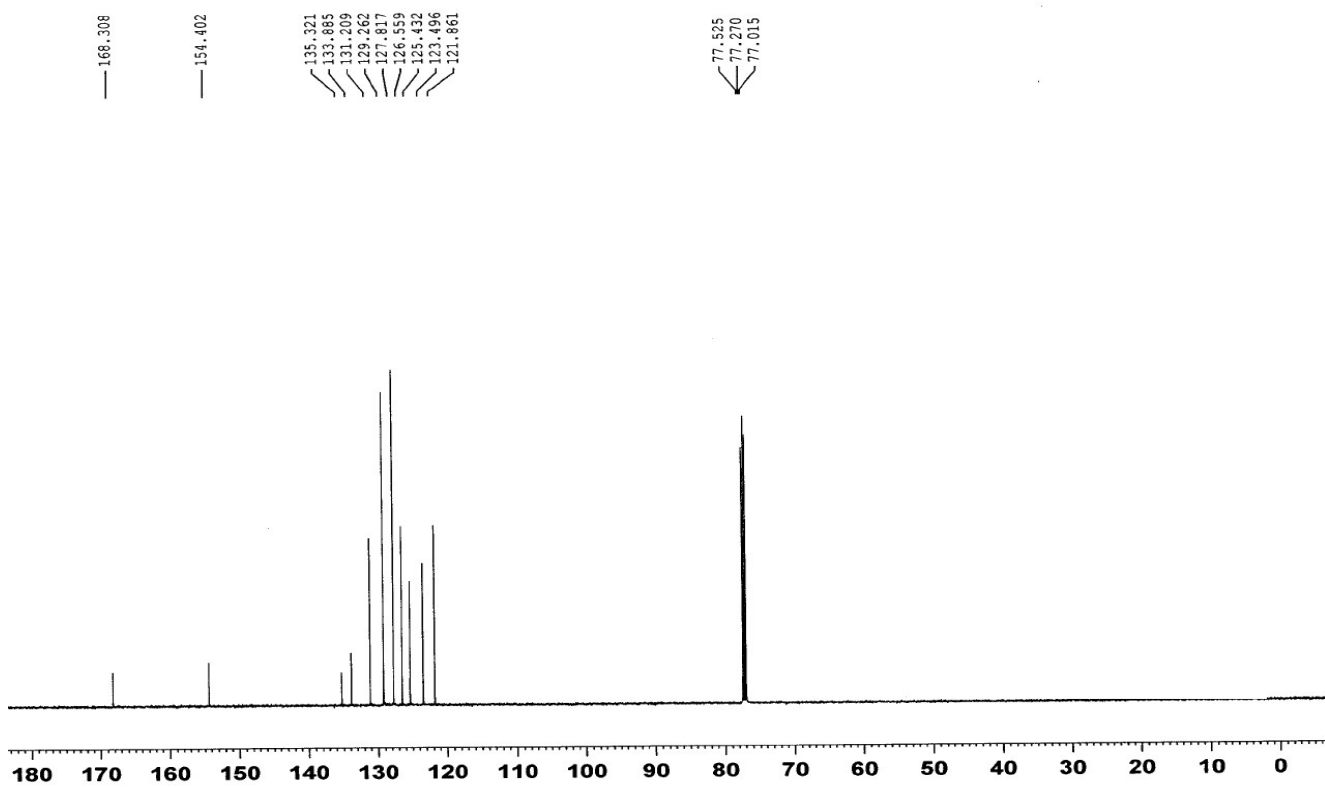

**3b**

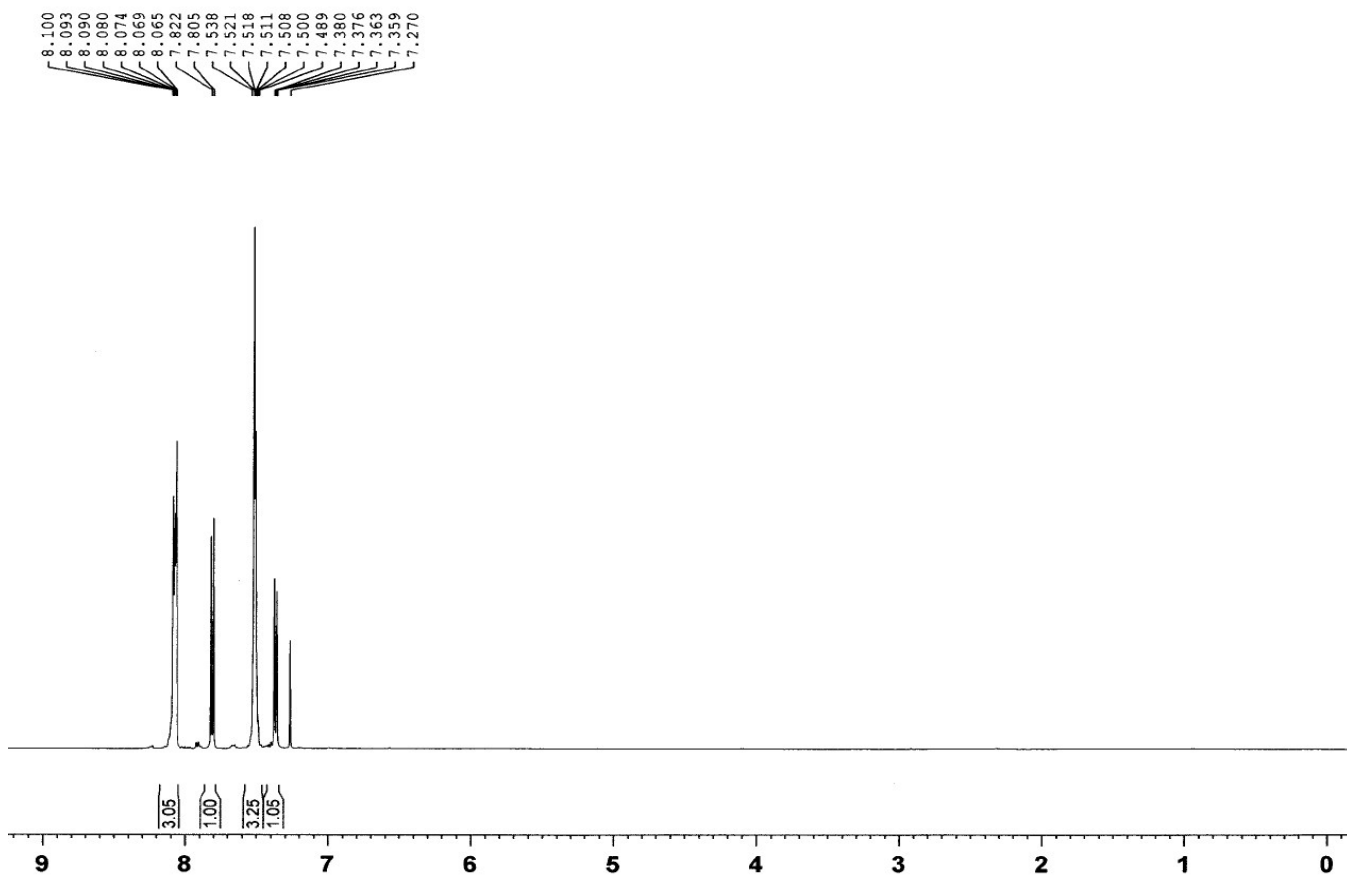

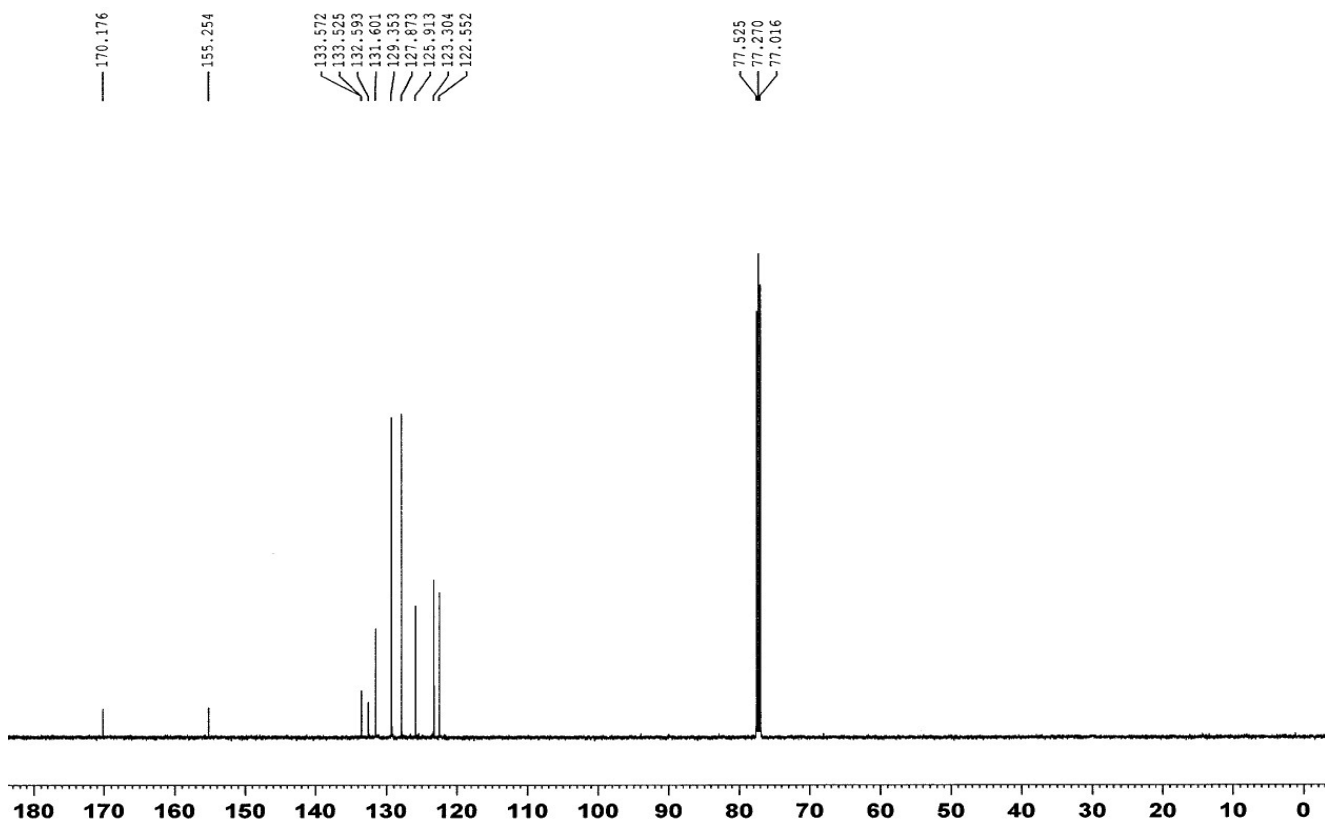

**3c**

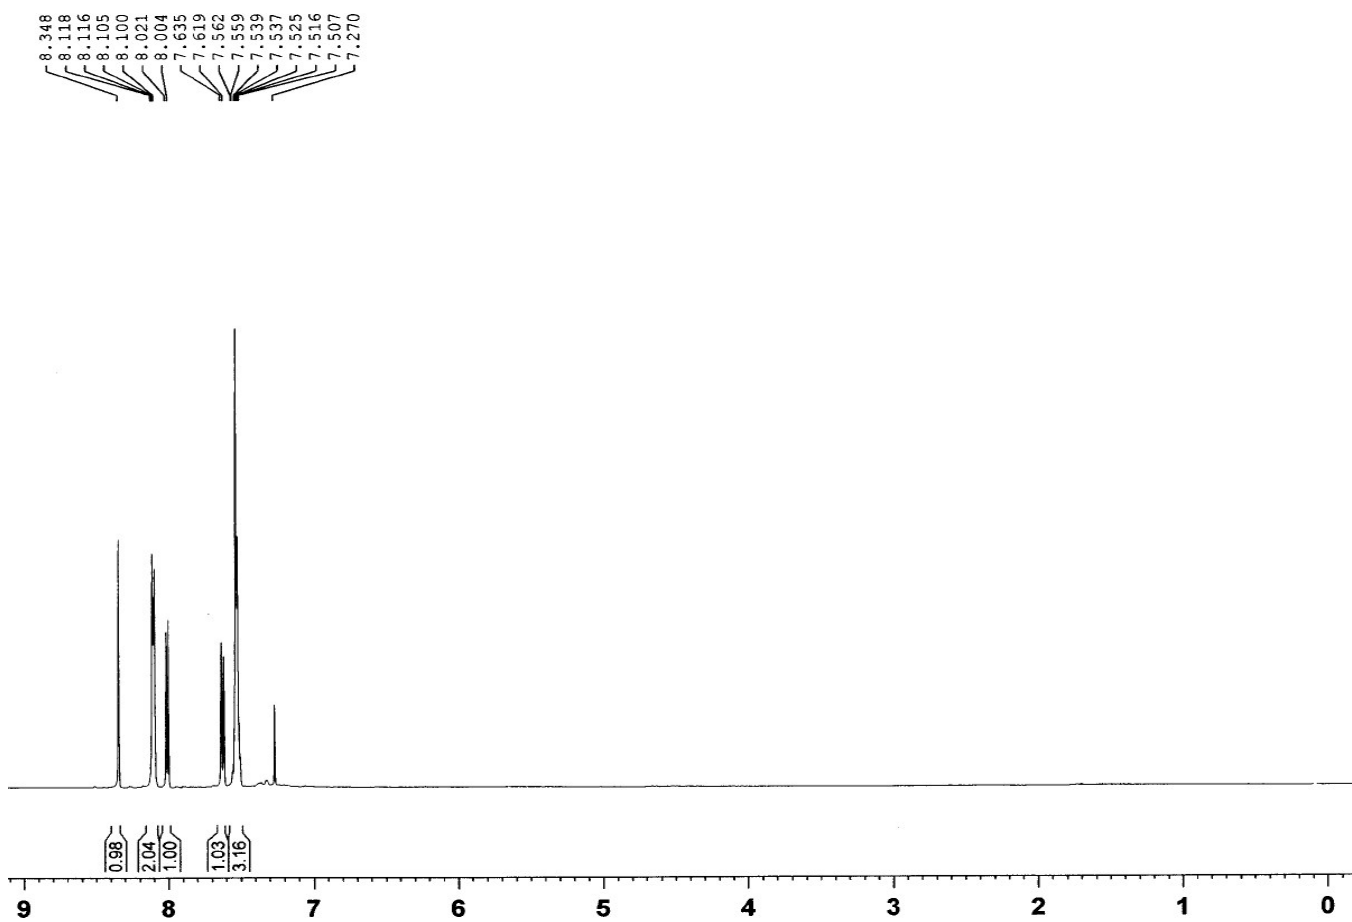

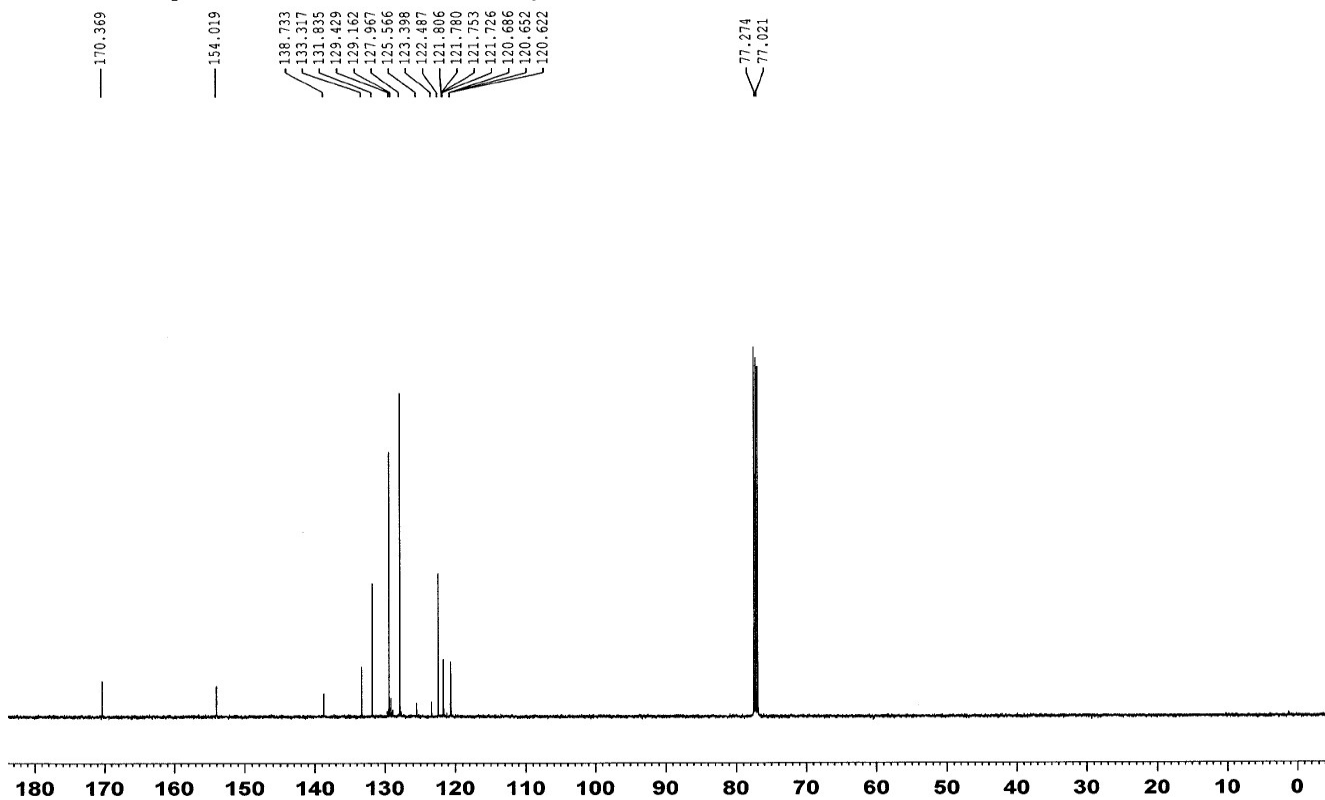

**3c <sup>19</sup>F NMR**

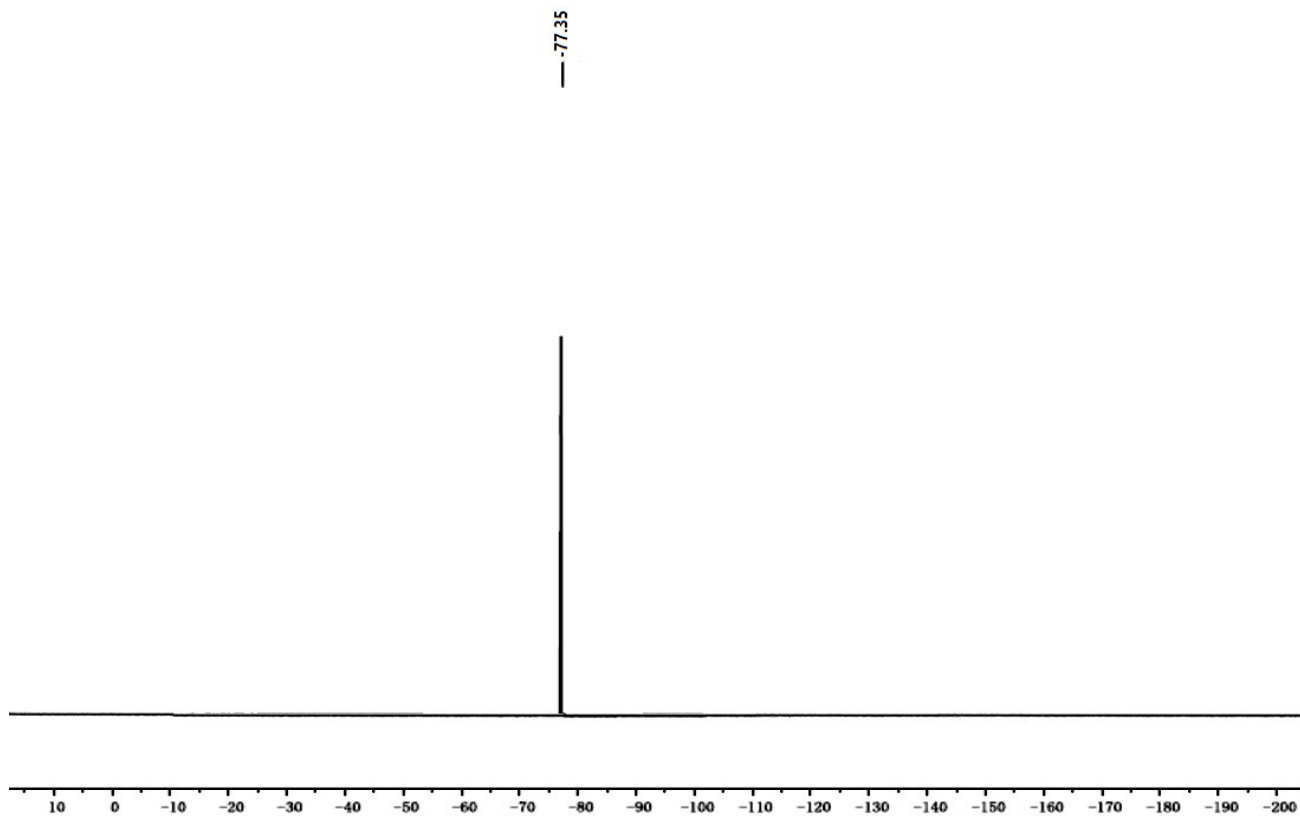

**3d**

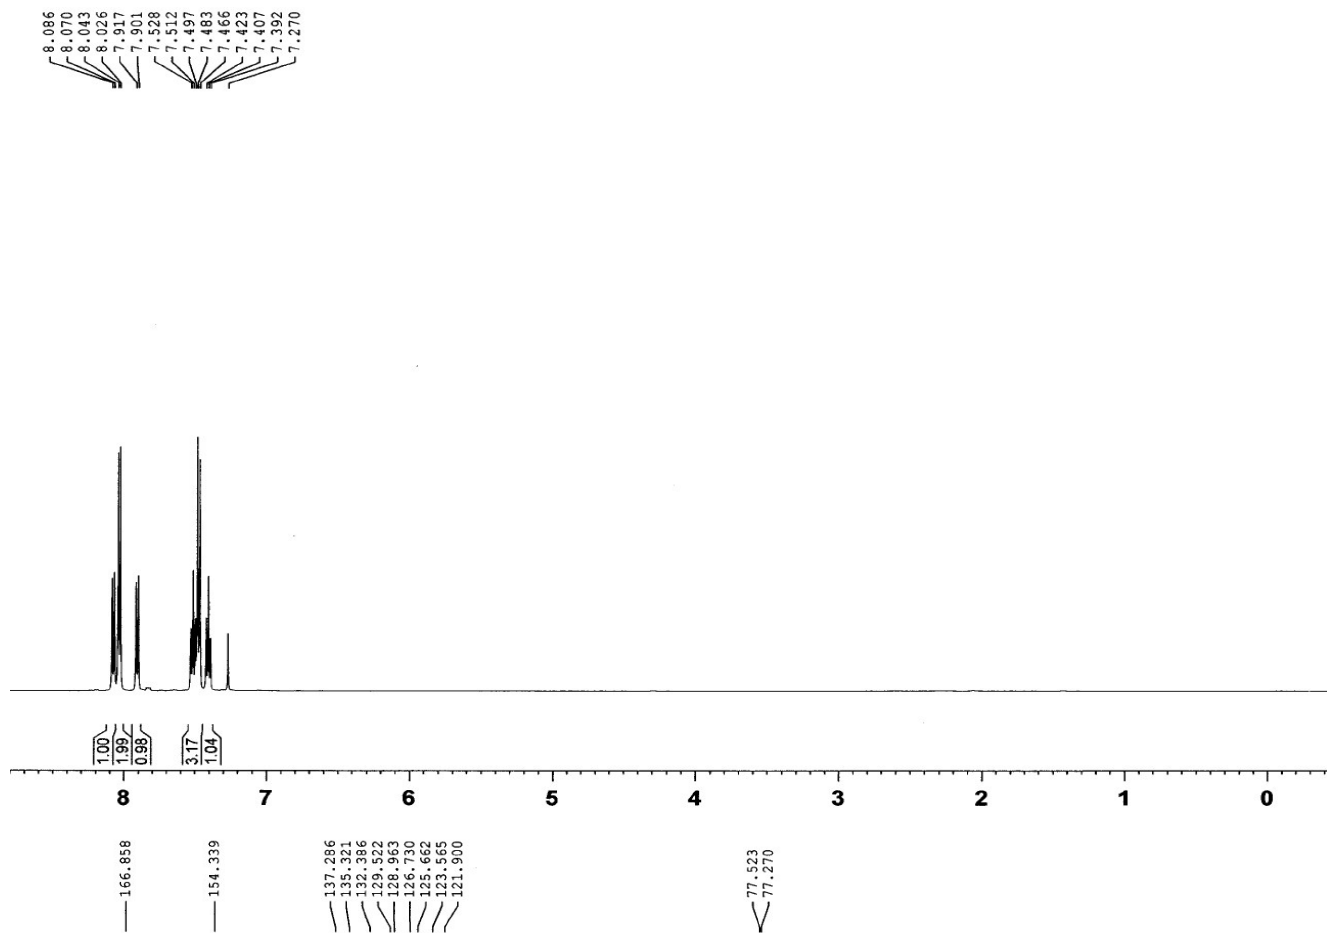

3e

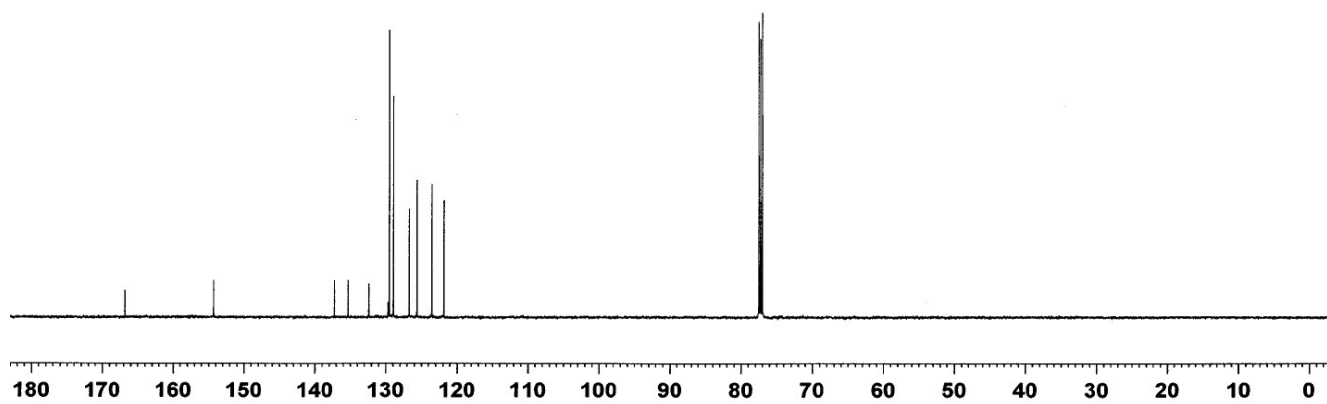

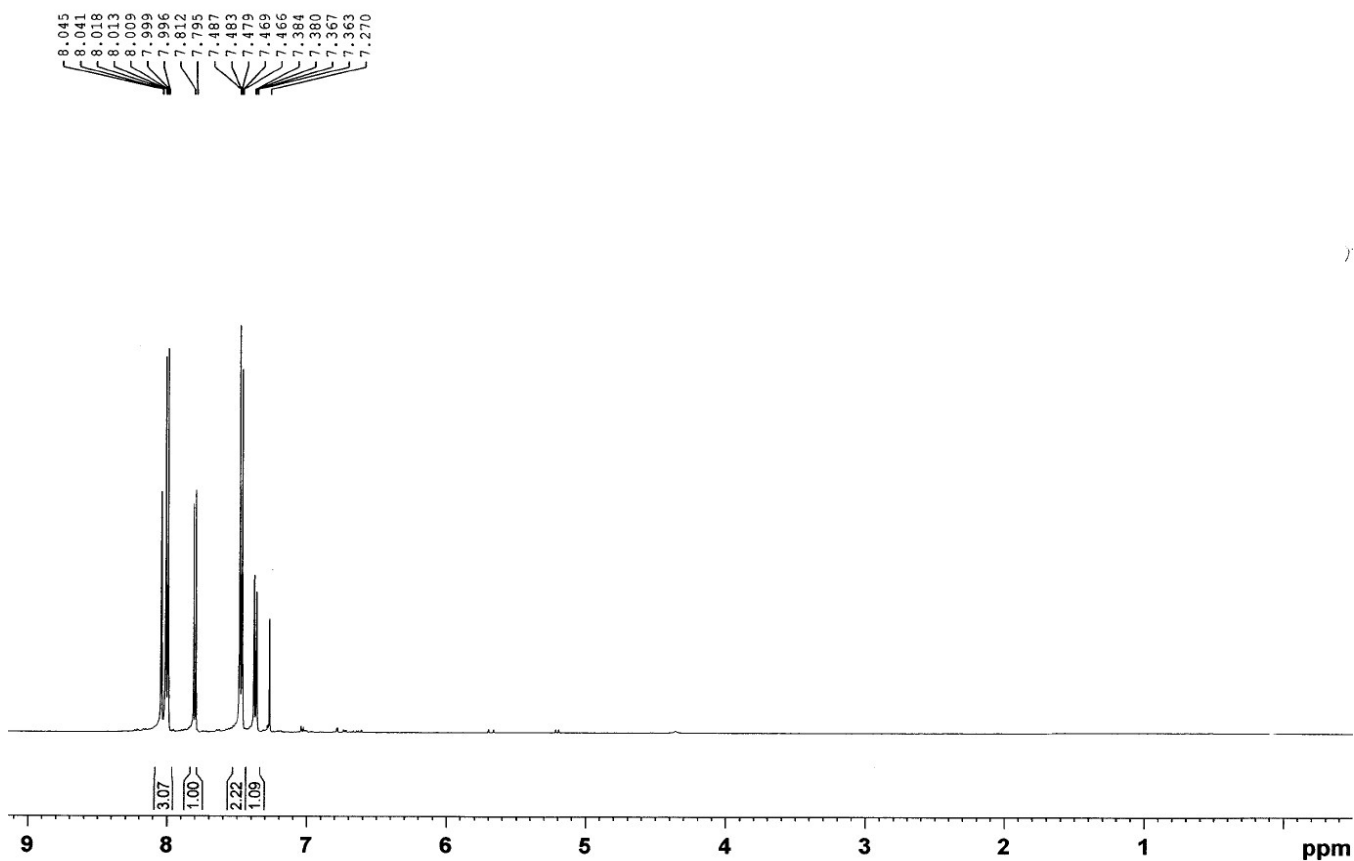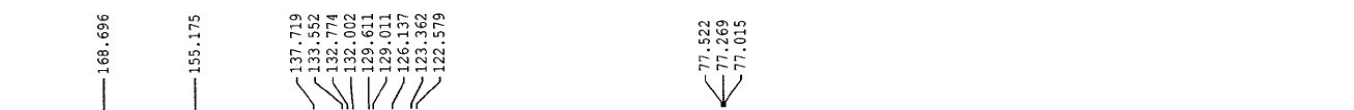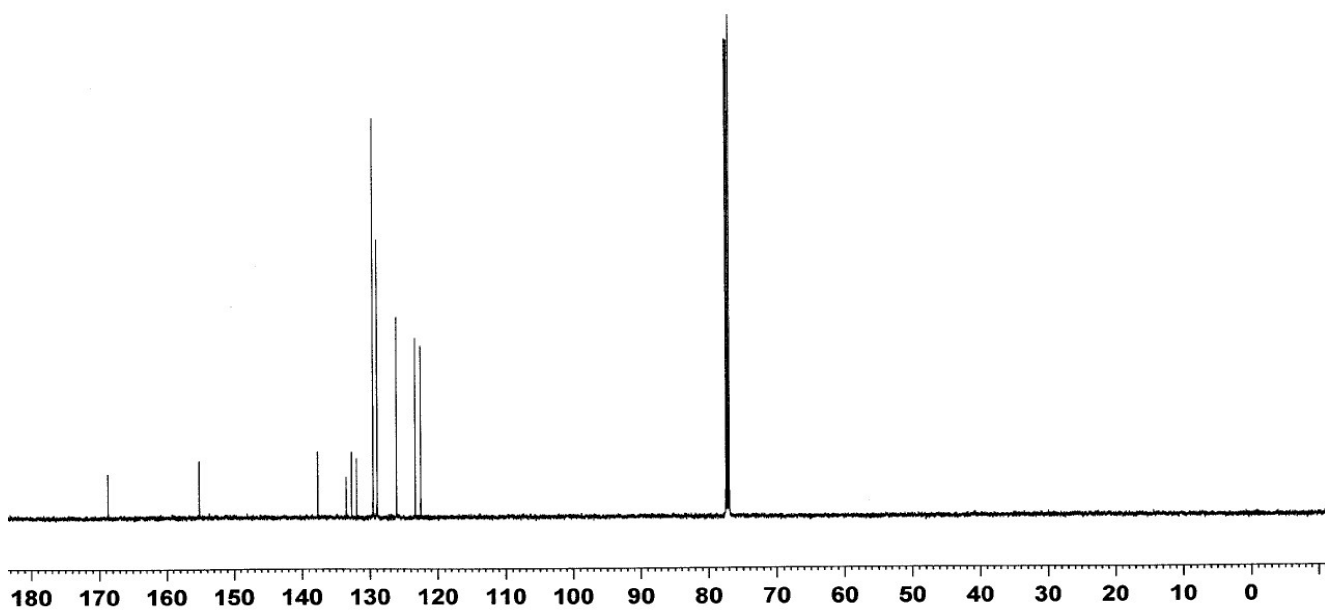

3f

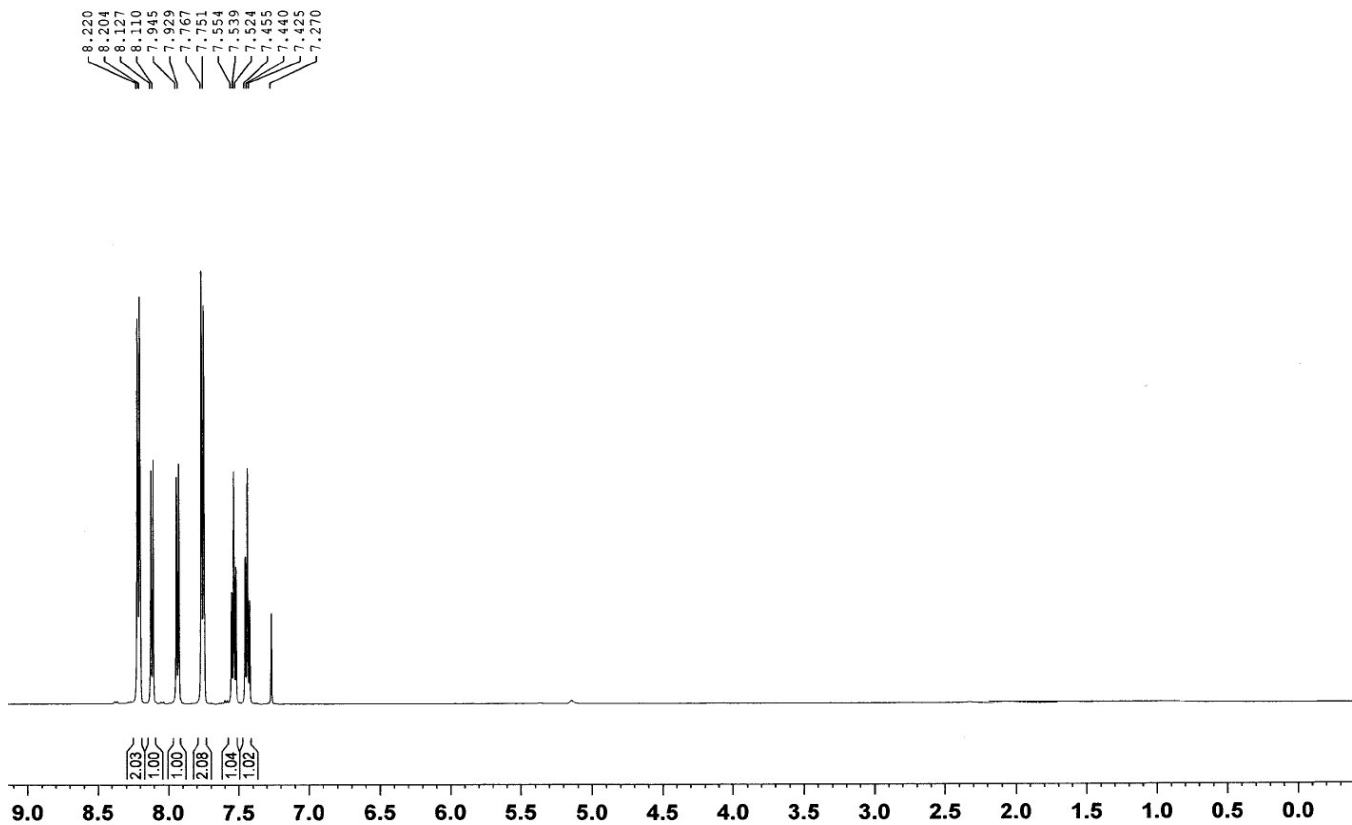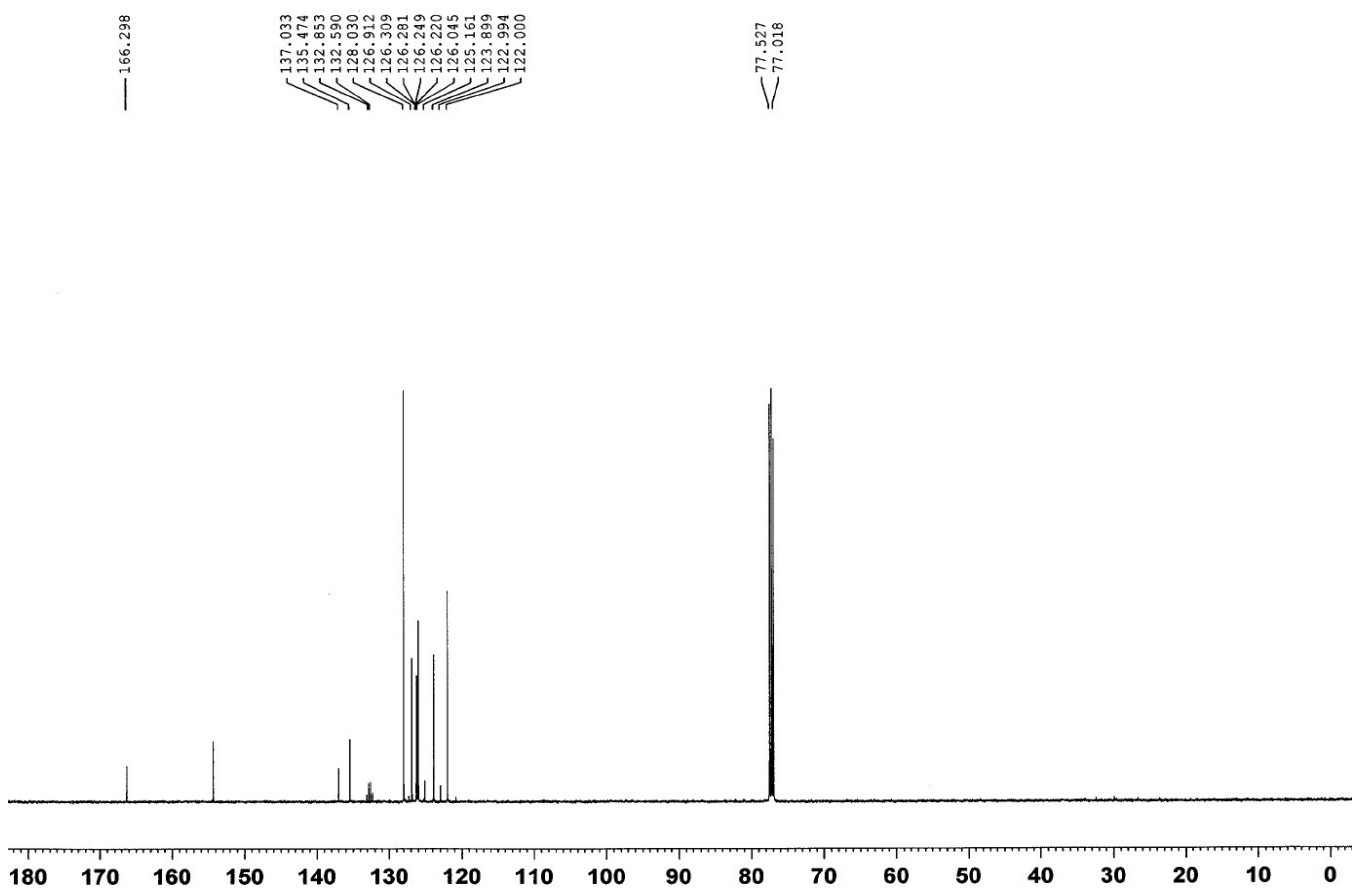

3f <sup>19</sup>F NMR

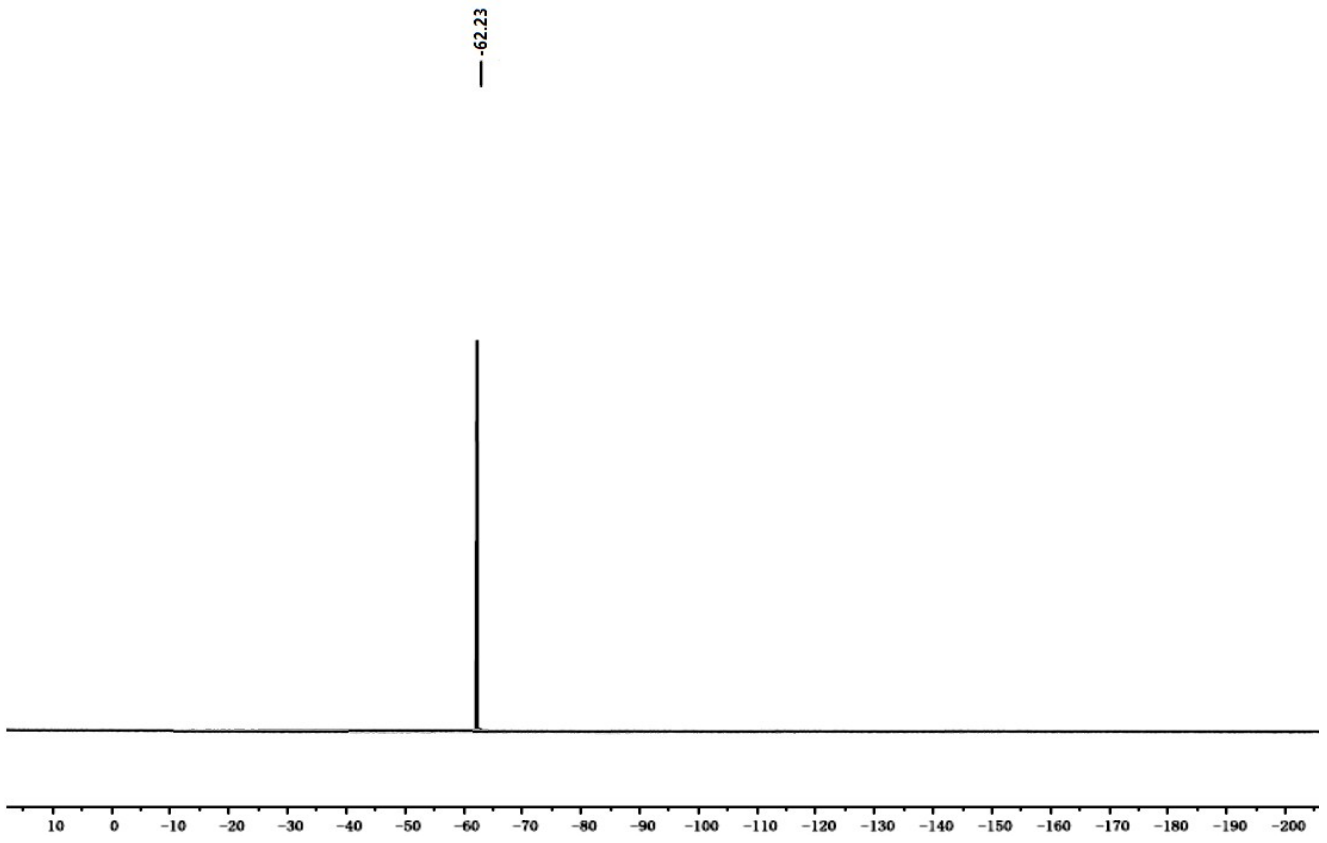

**3g**

8.379  
8.229  
8.213  
8.057  
8.040  
7.794  
7.778  
7.680  
7.664  
7.289

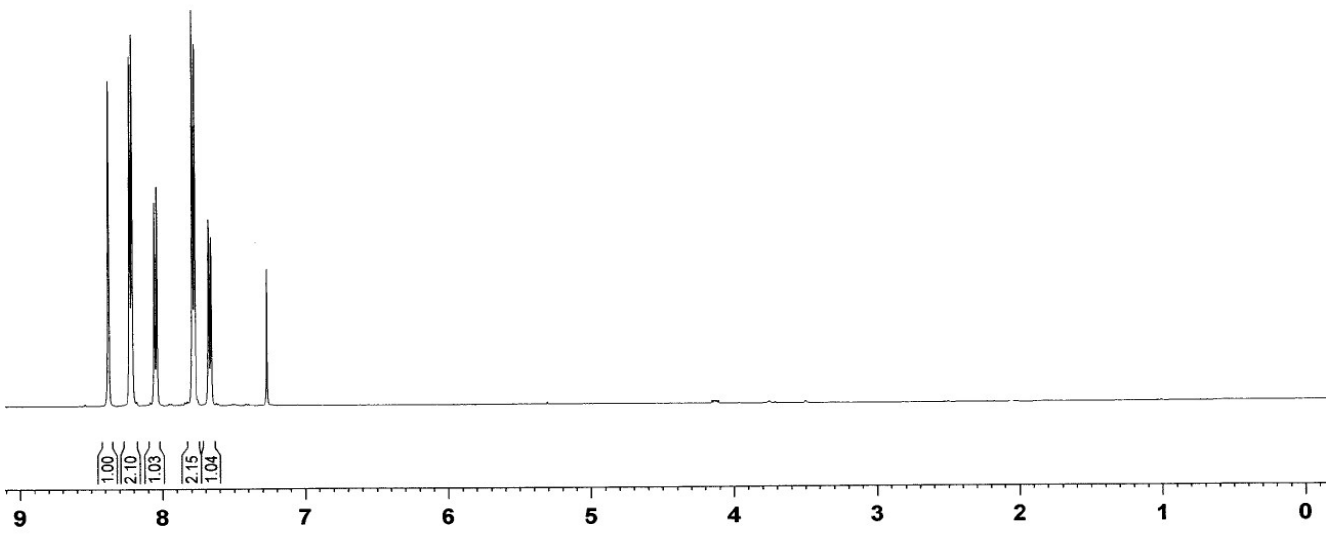



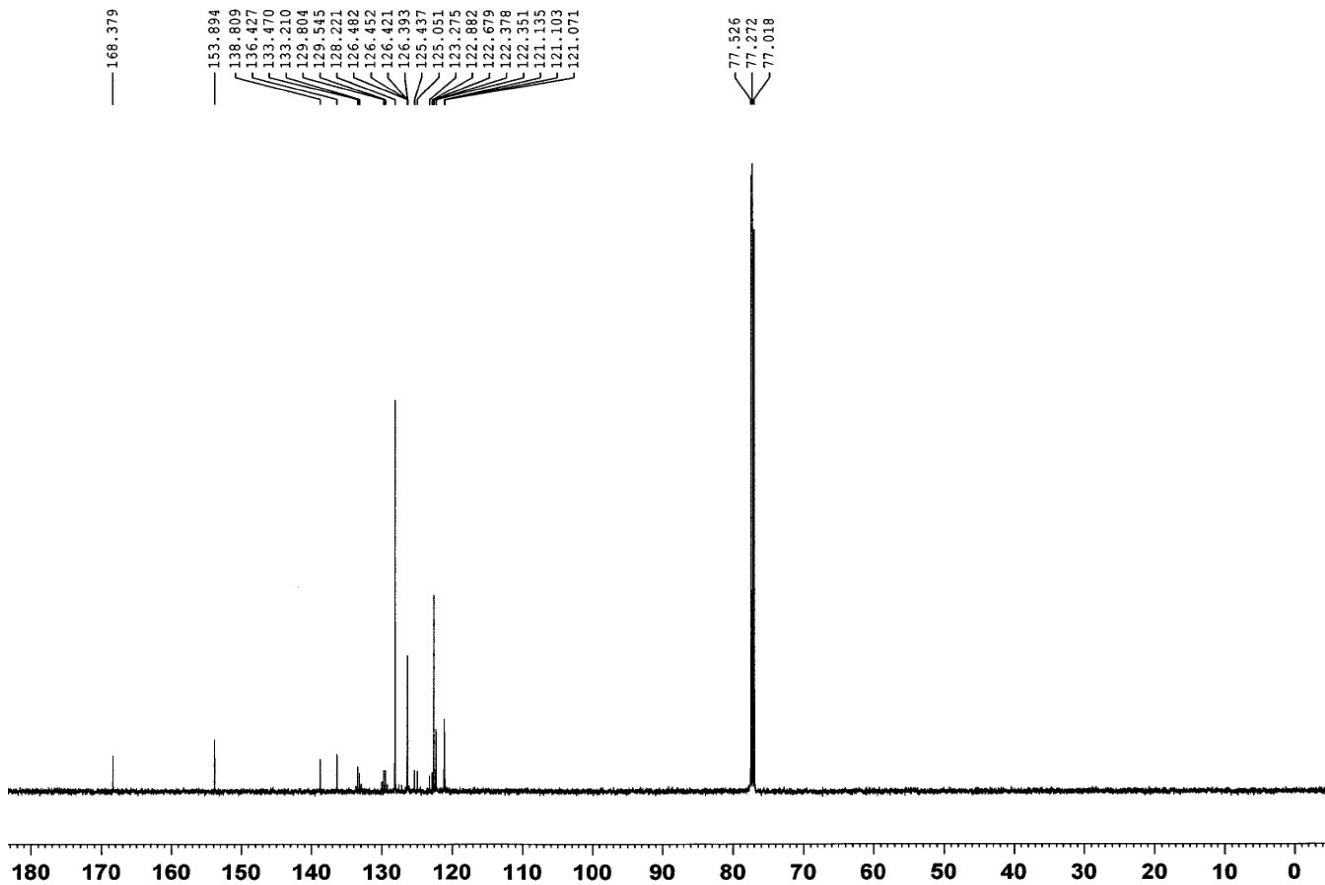

### 3g $^{19}\text{F}$ NMR

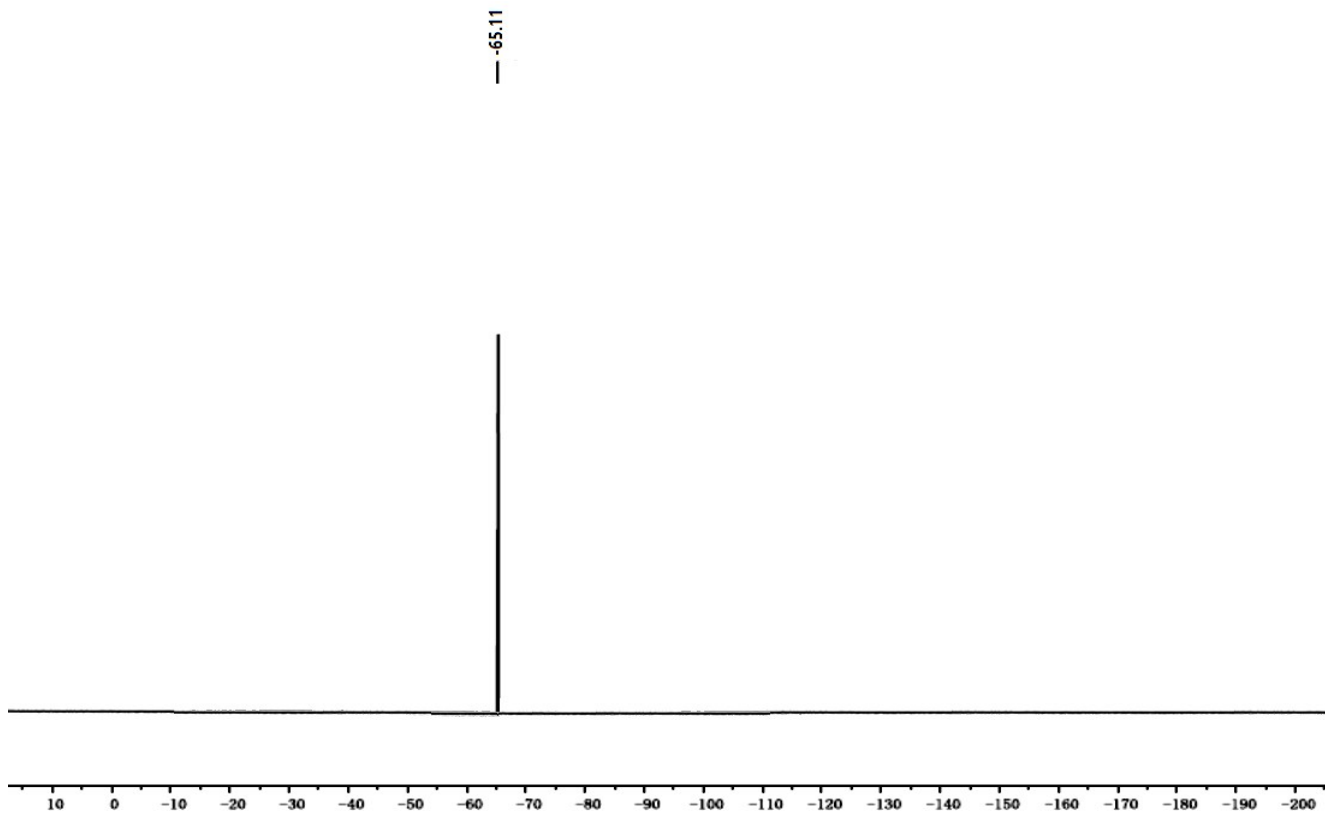

# 3h

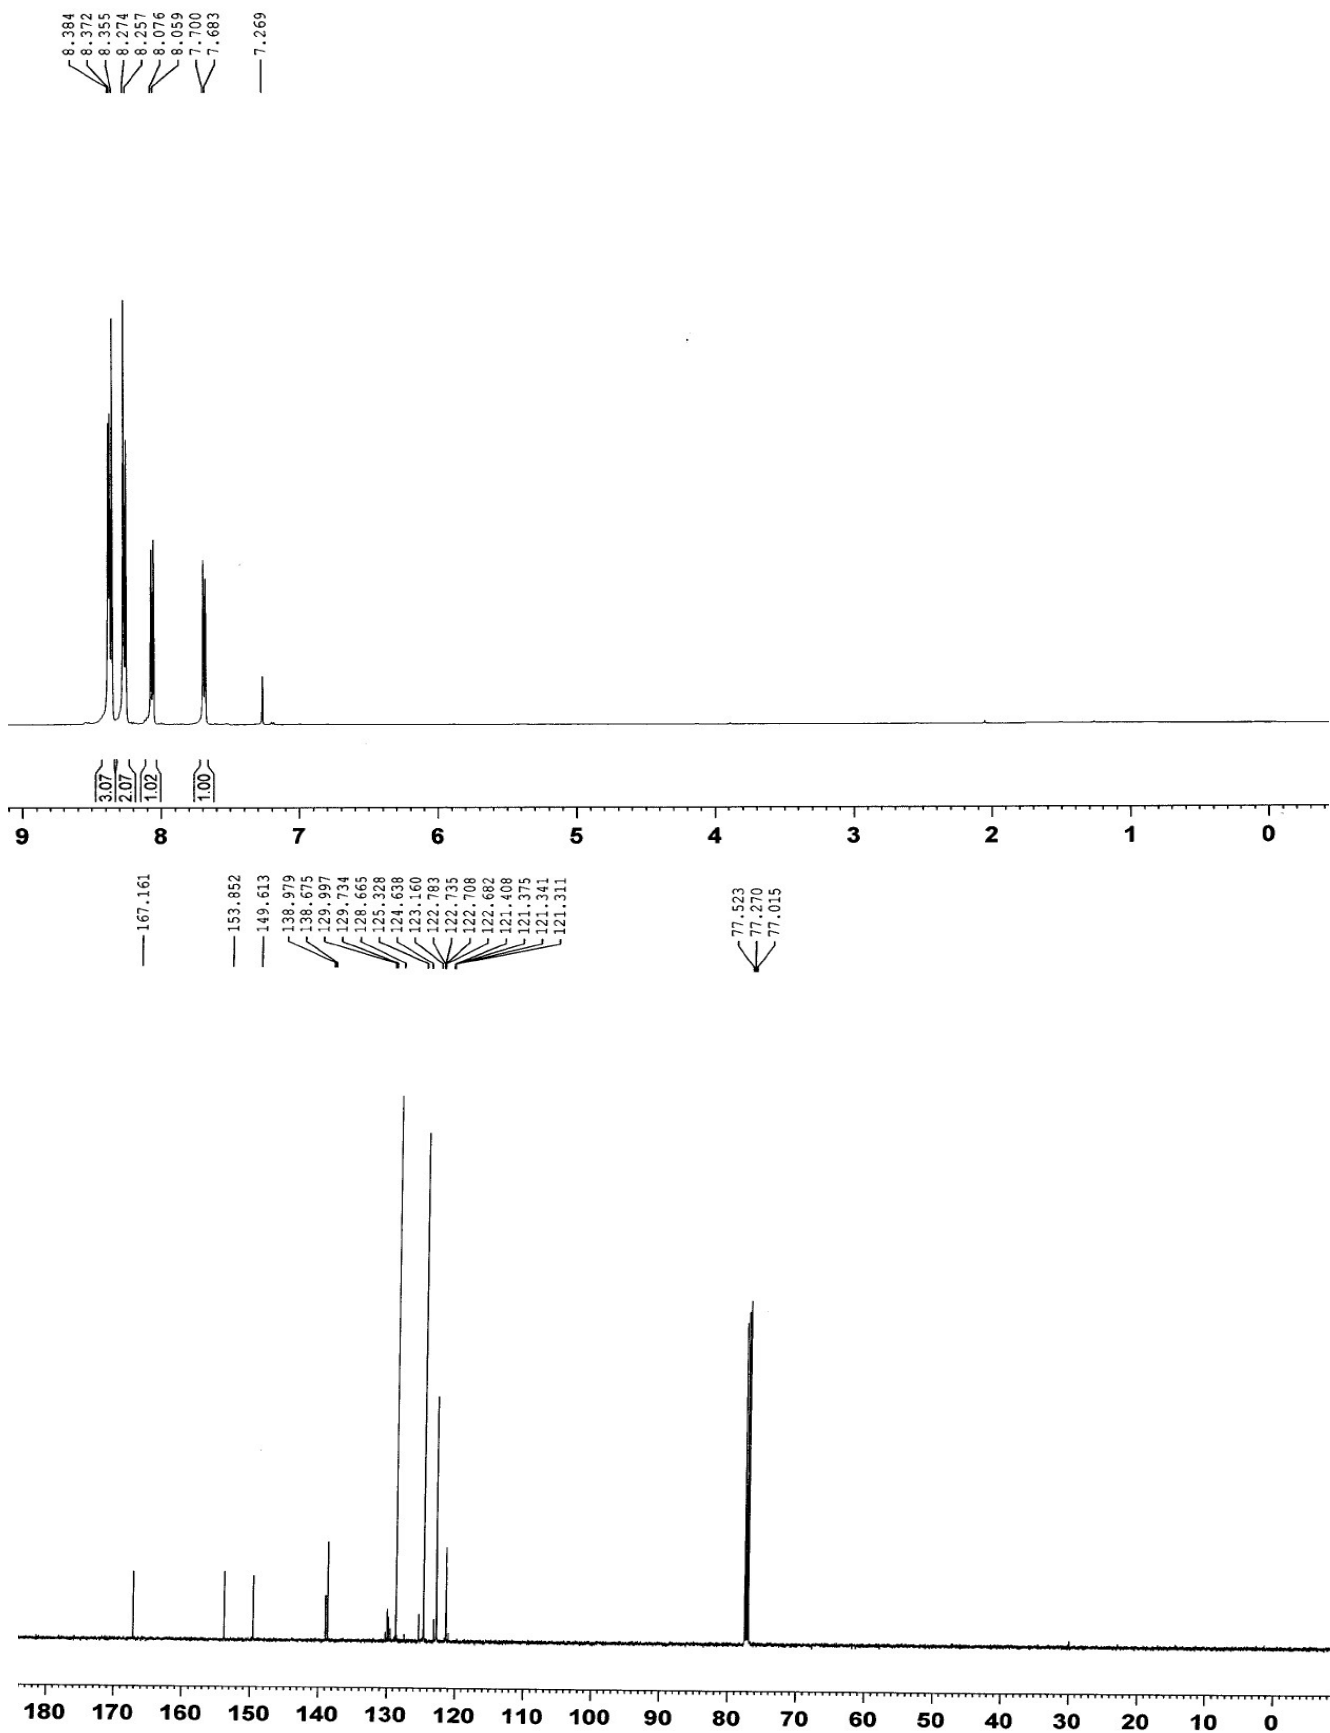

### 3h $^{19}\text{F}$ NMR

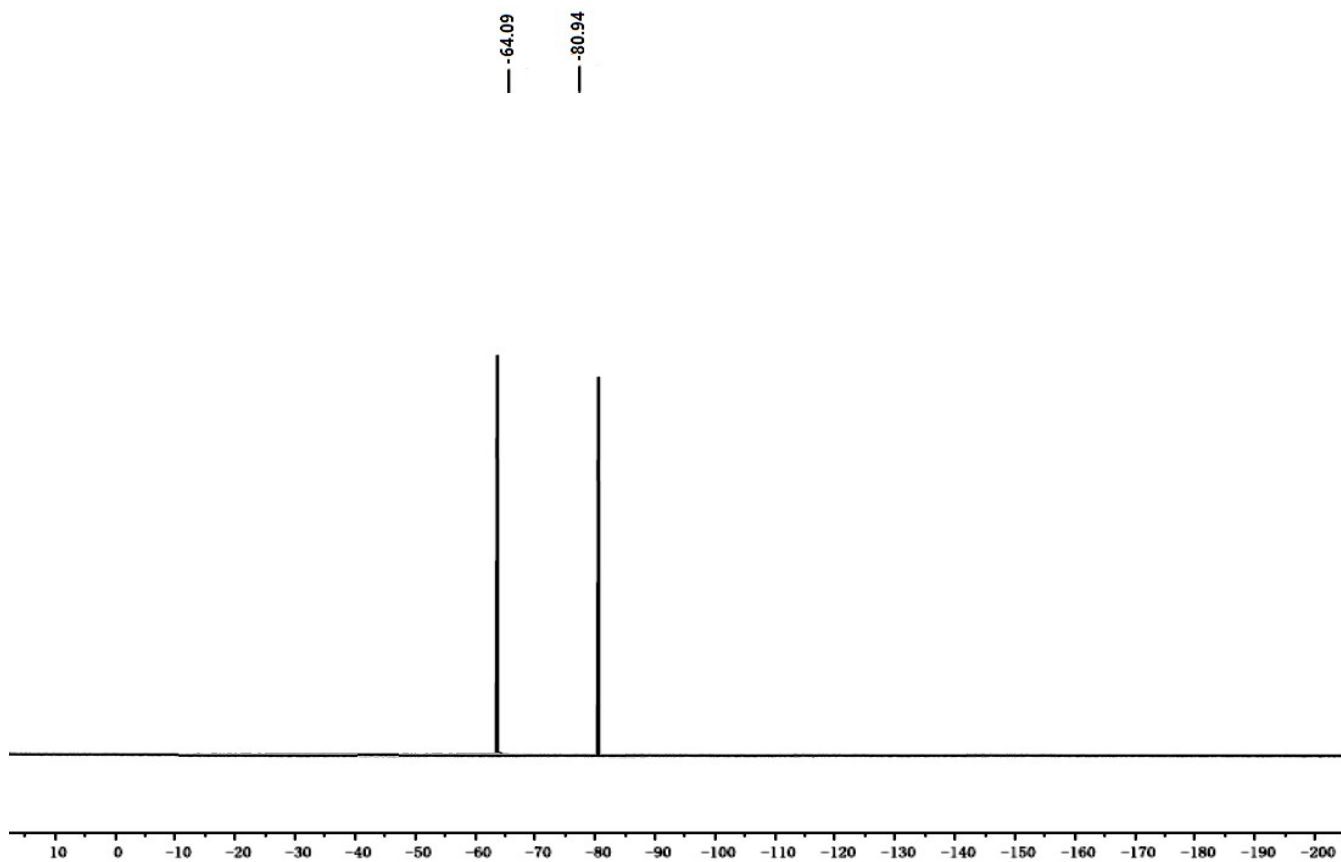

3i

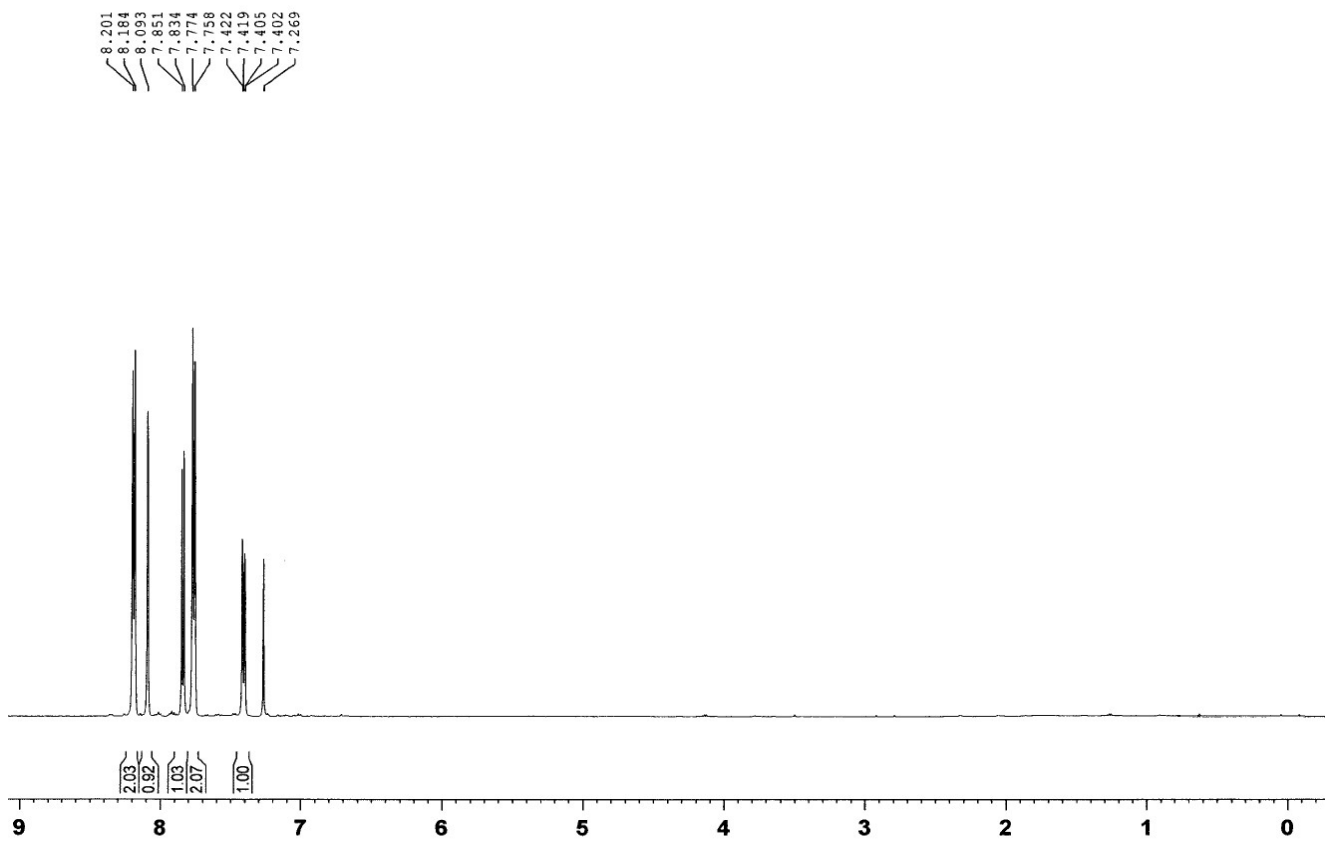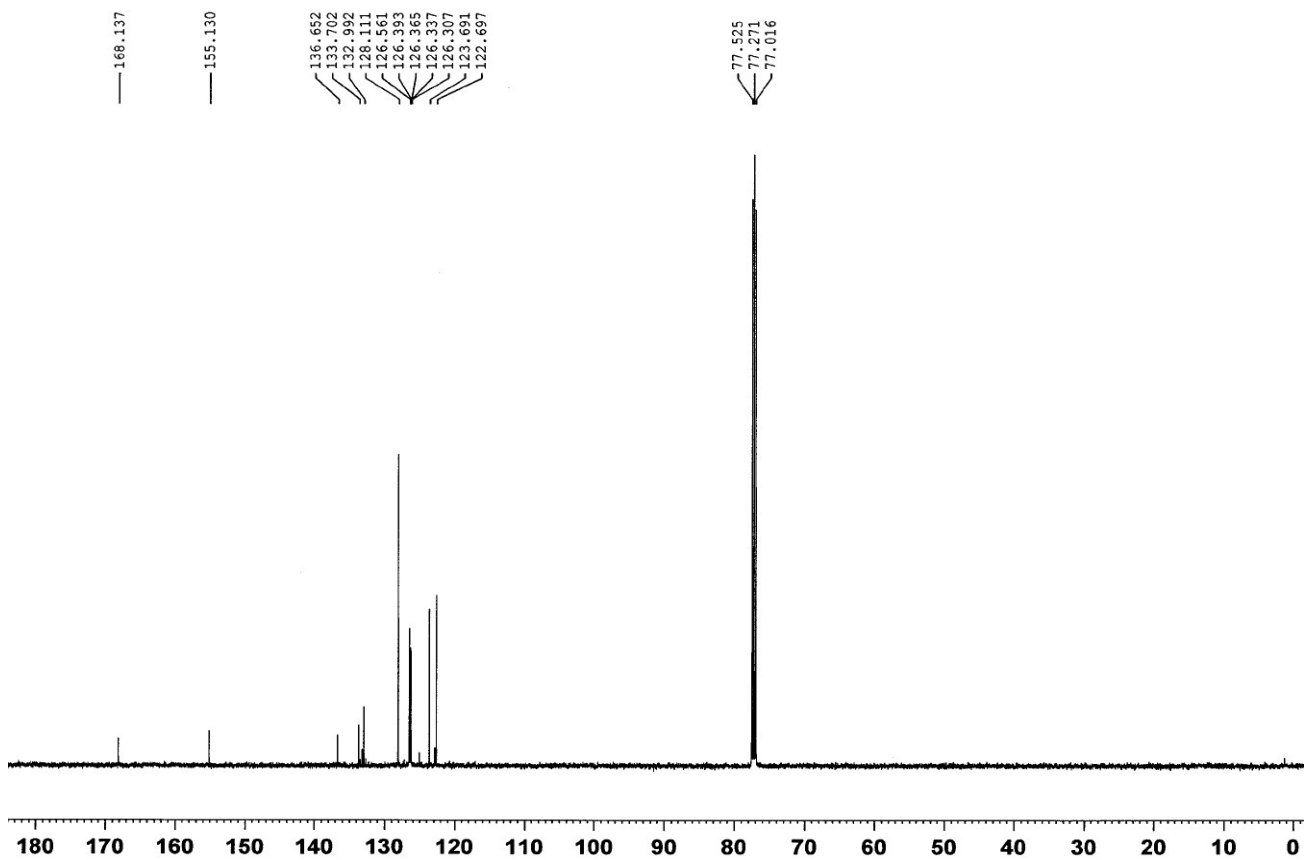

3i <sup>19</sup>F NMR

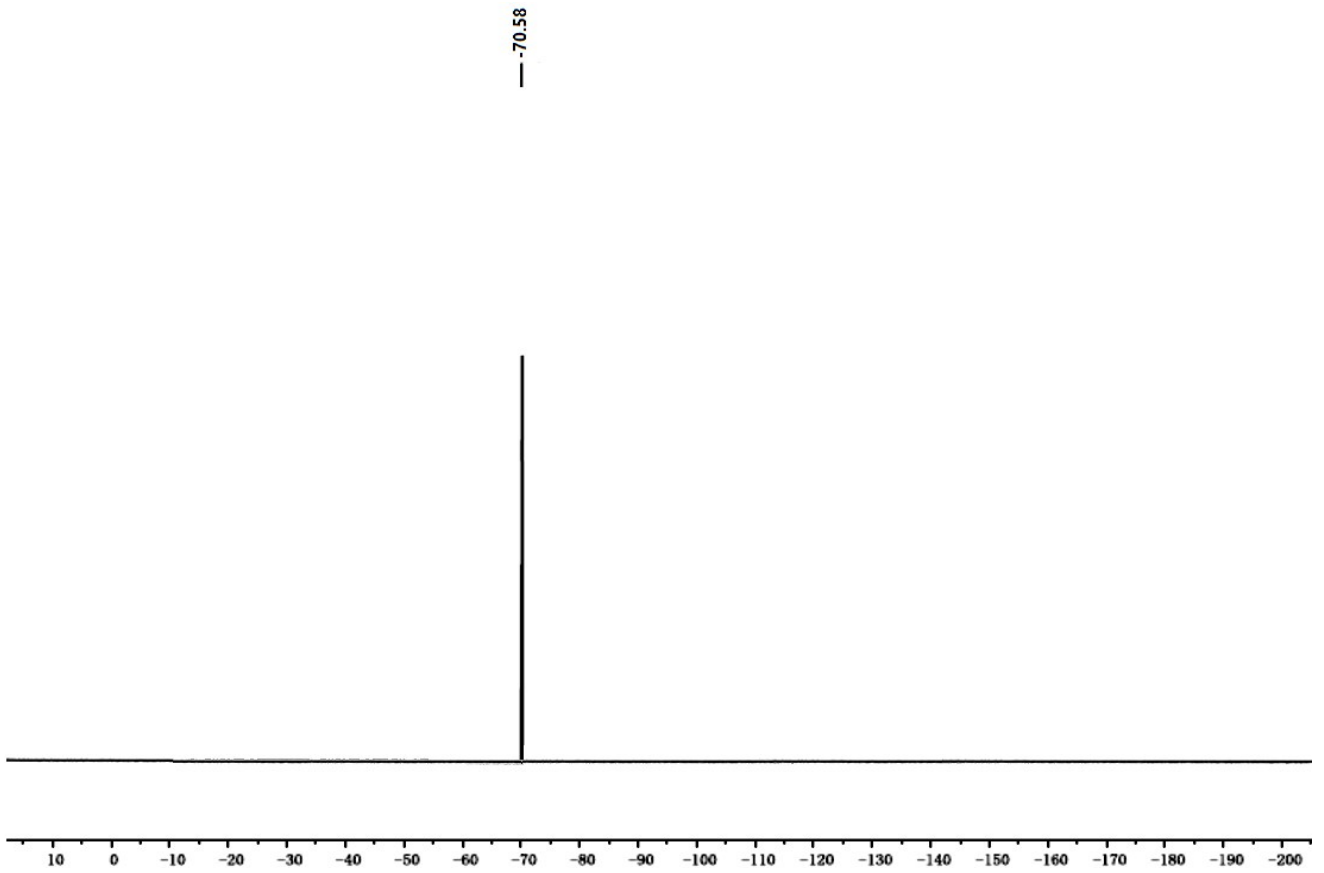

**5f**

8.366  
8.348  
8.256  
8.238  
8.109  
8.105  
7.875  
7.858  
7.450  
7.446  
7.433  
7.429  
7.270

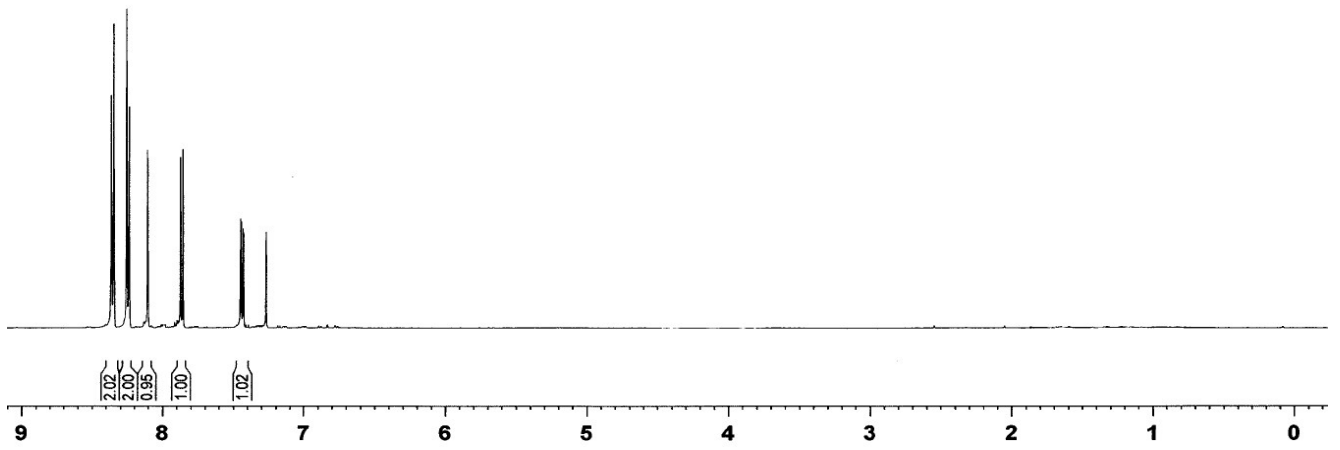

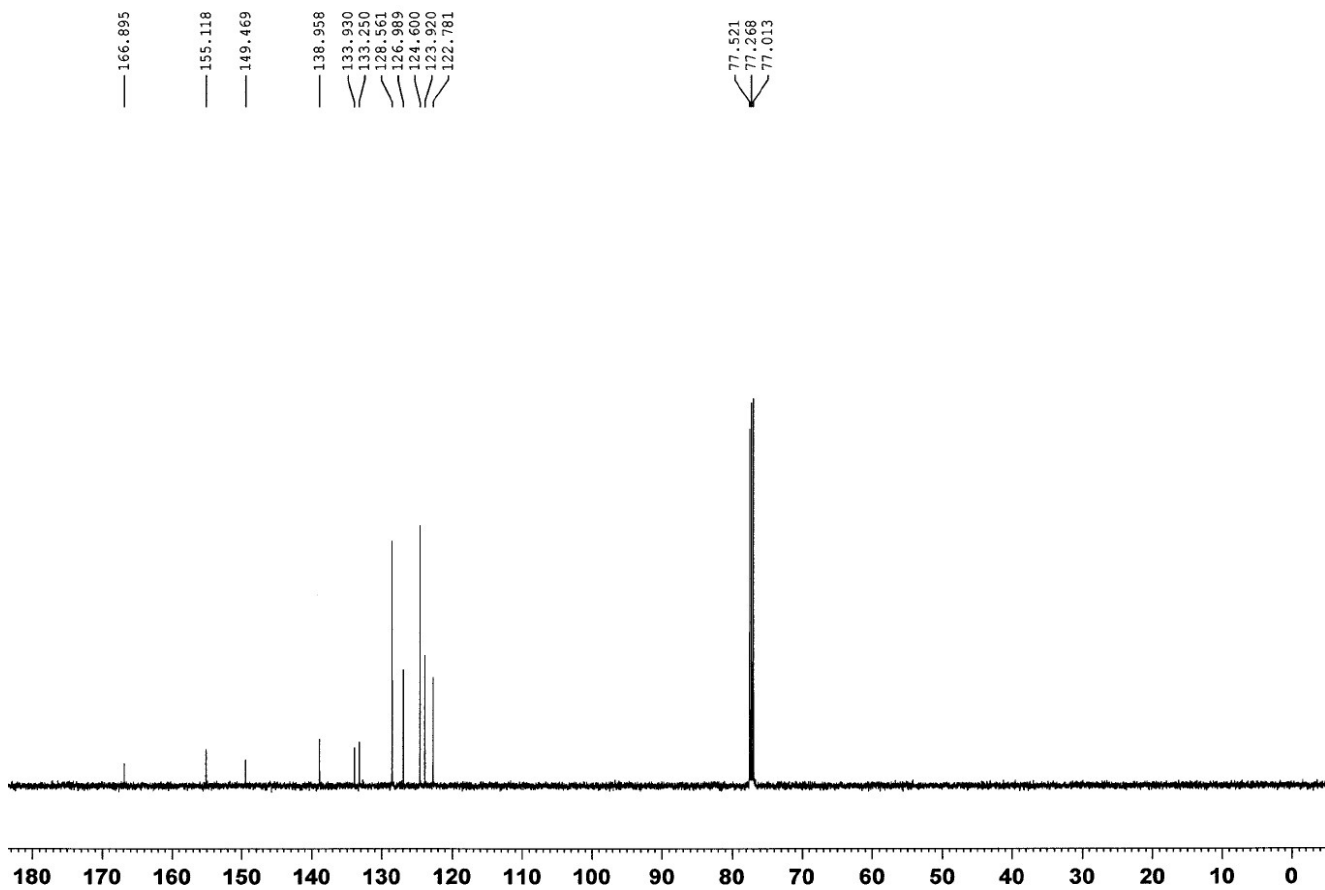

### 5f <sup>19</sup>F NMR

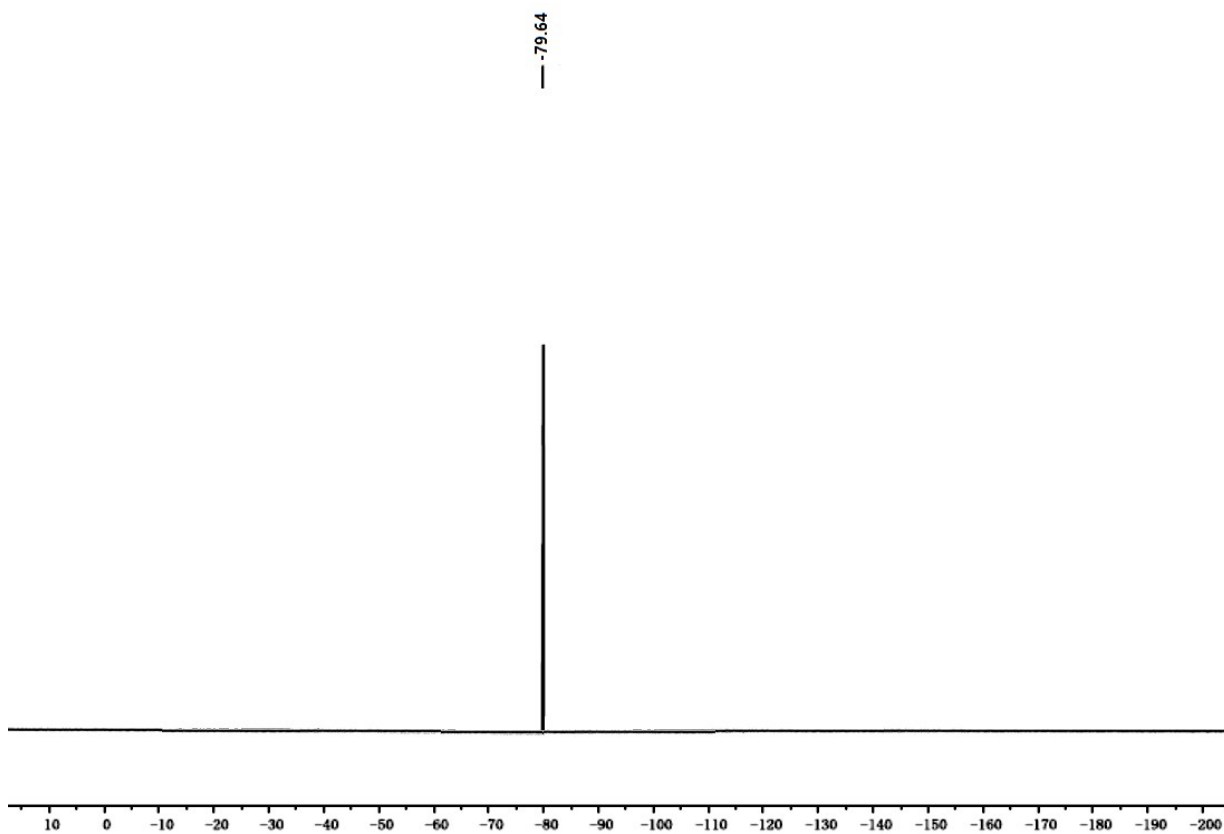

Supplement: c6cc10303k1.pdf [file c6cc10303k1.pdf]
